# Supplementary material for: Mediterranean Diet, Physical Activity and Gut Microbiome Composition: A Cross-Sectional Study among Healthy Young Italian Adults
Source: PubMed Central journal article supplement (PMC7401267; doi:10.3390/nu12072164), 2020-07-21
Supplement: nutrients-12-02164-s001.pdf [file nutrients-12-02164-s001.pdf]

**Supplementary Table 1.** Mean abundance values  $\pm$  SD of bacterial genera from fecal samples categorized per BMI category of participants. \*  $p < 0.05$ .

|                           | BMI                       |                    |                  |                    |
|---------------------------|---------------------------|--------------------|------------------|--------------------|
|                           | Underweight/Normal weight |                    | Overweight/Obese |                    |
|                           | Mean                      | Standard deviation | Mean             | Standard deviation |
| <i>Prevotella</i>         | 4.62                      | 8.22               | 3.93             | 8.05               |
| <i>Bacteroides</i>        | 21.95                     | 11.48              | 22.01            | 12.15              |
| <i>Sedimentibacter</i>    | .17                       | .95                | .19              | .68                |
| <i>Porphyromonas</i>      | .21                       | .97                | .05              | .10                |
| <i>Peptoniphilus</i>      | .38                       | 1.19               | .37              | .92                |
| <i>Halanaerobium</i>      | .15                       | .55                | .02              | .05                |
| <i>Corynebacterium</i>    | .55                       | 1.82               | .63              | 1.83               |
| <i>Negativicoccus</i>     | .56                       | 1.28               | .44              | .86                |
| <i>Faecalibacterium</i>   | 12.57                     | 6.75               | 13.30            | 7.56               |
| <i>Anaerococcus</i>       | .22                       | 1.40               | .15              | .48                |
| <i>Oscillospira</i>       | 2.05                      | 1.69               | 1.59             | 1.39               |
| <i>Blautia</i>            | 8.10                      | 4.66               | 8.52             | 4.85               |
| <i>Flavobacterium</i>     | 2.99                      | 3.69               | 1.87             | 1.72               |
| <i>Roseburia</i>          | 5.22                      | 4.97               | 4.25             | 4.48               |
| <i>Campylobacter</i>      | .10                       | .50                | .02              | .05                |
| <i>Lactobacillus</i>      | .77                       | 3.32               | .72              | 2.59               |
| <i>Clostridium</i>        | 1.28                      | 1.10               | 1.21             | .74                |
| <i>Ruminococcus</i>       | 8.70                      | 5.89               | 8.37             | 6.66               |
| <i>Lachnospira</i>        | 4.03                      | 2.09               | 4.93             | 2.56               |
| <i>Methylobacterium</i>   | .05                       | .15                | .06              | .11                |
| <i>Selenomonas</i>        | .23                       | .38                | .38*             | 1.30               |
| <i>Aminiphilus</i>        | .92                       | 1.95               | .59              | 1.20               |
| <i>Megasphaera</i>        | .12                       | .30                | .32*             | .88                |
| <i>Coprococcus</i>        | 1.33                      | 1.53               | 1.02             | 1.11               |
| <i>Fusobacterium</i>      | .02                       | .08                | .08<br>A         | .20                |
| <i>Parabacteroides</i>    | 2.17                      | 3.27               | 1.83             | 1.92               |
| <i>Sutterella</i>         | .78                       | .89                | .95              | 1.57               |
| <i>Streptomyces</i>       | .02                       | .07                | .01              | .02                |
| <i>Arcanobacterium</i>    | .01                       | .06                | .00              | .01                |
| <i>Streptococcus</i>      | 1.66                      | 2.09               | 4.03*            | 6.70               |
| <i>Actinomyces</i>        | .10                       | .15                | .40              | 1.23               |
| <i>Peptostreptococcus</i> | .02                       | .05                | .12              | .37                |
| <i>Mobiluncus</i>         | .02                       | .11                | .01              | .02                |
| <i>Collinsella</i>        | 1.96                      | 3.37               | 1.47             | 2.33               |
| <i>Acidaminococcus</i>    | .09                       | .28                | .07              | .16                |
| <i>Dorea</i>              | 1.17                      | 2.29               | 2.44*            | 4.26               |
| <i>Lachnobacterium</i>    | .28                       | .75                | .68*             | 2.43               |
| <i>Finegoldia</i>         | .08                       | .66                | .04              | .11                |
| <i>Odoribacter</i>        | .23                       | .21                | .21              | .21                |
| <i>Borrelia</i>           | .00                       | .02                | .00              | .00                |
| <i>Brevibacterium</i>     | .10                       | .22                | .05              | .03                |
| <i>Peptococcus</i>        | .13                       | .12                | .14              | .10                |
| <i>Slackia</i>            | .69                       | .52                | .82              | .61                |
| <i>Facklamia</i>          | .03                       | .16                | .00              | .00                |
| <i>Propionispora</i>      | .12                       | .13                | .10              | .08                |

|                               |     |      |       |      |
|-------------------------------|-----|------|-------|------|
| <i>Bilophila</i>              | .05 | .07  | .08   | .12  |
| <i>Atopobium</i>              | .24 | .32  | .20   | .22  |
| <i>Brevibacillus</i>          | .73 | 1.20 | .57   | .72  |
| <i>Butyricimonas</i>          | .21 | .18  | .16   | .18  |
| <i>Jannaschia</i>             | .19 | .32  | .28*  | .50  |
| <i>Lactococcus</i>            | .34 | 1.01 | .51   | .95  |
| <i>Candidatus Phytoplasma</i> | .09 | .14  | .06   | .04  |
| <i>Dialister</i>              | .35 | .77  | 1.07* | 2.34 |
| <i>Megamonas</i>              | .30 | 2.53 | .49   | 2.21 |
| <i>Veillonella</i>            | .11 | .14  | .11   | .07  |
| <i>Ureaplasma</i>             | .00 | .01  | .00   | .01  |
| <i>Rhodospirillum</i>         | .15 | .12  | .15   | .11  |
| <i>Mesoplasma</i>             | .01 | .01  | .00   | .01  |
| <i>Pectinatus</i>             | .02 | .01  | .02   | .02  |
| <i>Fibrobacter</i>            | .03 | .06  | .02   | .02  |
| <i>Tenacibaculum</i>          | .02 | .05  | .00   | .00  |
| <i>Bartonella</i>             | .10 | .10  | .07   | .09  |
| <i>Methylocella</i>           | .05 | .15  | .03   | .01  |
| <i>Emticicia</i>              | .05 | .07  | .04   | .02  |
| <i>Bifidobacterium</i>        | .26 | .29  | .29   | .28  |
| <i>Sediminibacillus</i>       | .01 | .07  | .00   | .00  |
| <i>Eggerthella</i>            | .12 | .19  | .14   | .31  |
| <i>Acholeplasma</i>           | .14 | .16  | .12   | .07  |
| <i>Microbacterium</i>         | .10 | .23  | .08   | .05  |
| <i>Anaerostipes</i>           | .27 | .66  | .16   | .17  |
| <i>Desulfovibrio</i>          | .07 | .14  | .03   | .02  |
| <i>Pedobacter</i>             | .08 | .16  | .04   | .05  |
| <i>Eubacterium</i>            | .71 | 2.20 | 1.61* | 3.43 |
| <i>Mycobacterium</i>          | .01 | .01  | .01   | .01  |
| <i>Paraprevotella</i>         | .19 | .30  | .08*  | .13  |
| <i>Varibaculum</i>            | .04 | .27  | .01   | .04  |
| <i>Paucibacter</i>            | .01 | .01  | .02*  | .06  |
| <i>Mogibacterium</i>          | .04 | .07  | .04   | .07  |
| <i>Anaerotruncus</i>          | .04 | .05  | .08*  | .12  |
| <i>Chlorobaculum</i>          | .01 | .01  | .00   | .00  |
| <i>Thermoanaerobacterium</i>  | .00 | .01  | .00   | .00  |
| <i>Desulfosporosinus</i>      | .03 | .07  | .05   | .07  |
| <i>Trabulsiella</i>           | .15 | .45  | .08   | .21  |
| <i>Adlercreutzia</i>          | .15 | .55  | .07   | .09  |
| <i>Brachybacterium</i>        | .00 | .03  | .00   | .00  |
| <i>Paenibacillus</i>          | .03 | .08  | .01   | .01  |
| <i>Pseudomonas</i>            | .60 | 3.48 | .04   | .13  |
| <i>Salinicoccus</i>           | .31 | 1.05 | .32   | .58  |
| <i>Turicibacter</i>           | .24 | 1.26 | .12   | .24  |
| <i>Enterococcus</i>           | .64 | 1.53 | .44   | .81  |
| <i>Lautropia</i>              | .02 | .08  | .01   | .02  |
| <i>Stenoxybacter</i>          | .01 | .02  | .01   | .01  |
| <i>Dysgonomonas</i>           | .01 | .04  | .01   | .01  |
| <i>Geobacillus</i>            | .04 | .05  | .03   | .02  |
| <i>Actinobaculum</i>          | .02 | .14  | .01   | .02  |
| <i>Alkaliphilus</i>           | .04 | .11  | .05   | .15  |
| <i>Caldicellulosiruptor</i>   | .00 | .00  | .01   | .01  |
| <i>Fructobacillus</i>         | .05 | .06  | .04   | .03  |
| <i>Natronincola</i>           | .04 | .08  | .03   | .09  |

|                              |     |      |     |      |
|------------------------------|-----|------|-----|------|
| <i>Phascolarctobacterium</i> | .50 | .81  | .29 | .49  |
| <i>Thermodesulfovibrio</i>   | .01 | .02  | .01 | .01  |
| <i>Dethiosulfovibrio</i>     | .00 | .01  | .00 | .00  |
| <i>Flammeovirga</i>          | .00 | .00  | .00 | .00  |
| <i>Novosphingobium</i>       | .01 | .03  | .00 | .00  |
| <i>Oxalobacter</i>           | .01 | .02  | .01 | .03  |
| <i>Staphylococcus</i>        | .05 | .23  | .05 | .17  |
| <i>Acetobacterium</i>        | .02 | .11  | .00 | .01  |
| <i>Azospirillum</i>          | .02 | .02  | .02 | .01  |
| <i>Sporosarcina</i>          | .05 | .52  | .00 | .00  |
| <i>Syntrophomonas</i>        | .01 | .02  | .01 | .01  |
| <i>Caldilinea</i>            | .01 | .01  | .01 | .01  |
| <i>Coprobacillus</i>         | .29 | 1.05 | .64 | 1.93 |
| <i>Jeotgalicoccus</i>        | .00 | .03  | .00 | .00  |
| <i>Kitasatospora</i>         | .01 | .02  | .01 | .01  |
| <i>Rhodanobacter</i>         | .00 | .02  | .01 | .01  |
| <i>Zhouia</i>                | .05 | .10  | .03 | .04  |
| <i>Carboxydocella</i>        | .00 | .00  | .00 | .00  |
| <i>Carnobacterium</i>        | .03 | .19  | .01 | .01  |
| <i>Chryseobacterium</i>      | .28 | 2.21 | .01 | .02  |
| <i>Enterobacter</i>          | .21 | .66  | .07 | .13  |
| <i>Luteococcus</i>           | .00 | .01  | .00 | .00  |
| <i>Marinobacter</i>          | .00 | .01  | .00 | .00  |
| <i>Microvirus</i>            | .01 | .01  | .01 | .01  |
| <i>Paracoccus</i>            | .02 | .08  | .01 | .01  |
| <i>Roseospira</i>            | .02 | .12  | .01 | .01  |
| <i>Sinorhizobium</i>         | .03 | .12  | .01 | .02  |
| <i>Trichococcus</i>          | .06 | .34  | .02 | .04  |
| <i>Amycolatopsis</i>         | .01 | .05  | .00 | .00  |
| <i>Anaerofilum</i>           | .01 | .02  | .02 | .04  |
| <i>Arcobacter</i>            | .07 | .39  | .00 | .00  |
| <i>Brochothrix</i>           | .01 | .01  | .01 | .01  |
| <i>Caulobacter</i>           | .01 | .01  | .00 | .01  |
| <i>Luteibacter</i>           | .01 | .03  | .01 | .01  |
| <i>Pseudoalteromonas</i>     | .01 | .01  | .01 | .01  |
| <i>Thermicanus</i>           | .01 | .01  | .01 | .01  |
| <i>Thiothrix</i>             | .00 | .00  | .00 | .00  |
| <i>Achromobacter</i>         | .07 | .45  | .02 | .07  |
| <i>Arthrobacter</i>          | .08 | .78  | .00 | .00  |
| <i>Desulfonatronovibrio</i>  | .03 | .05  | .03 | .02  |
| <i>Dyadobacter</i>           | .00 | .02  | .00 | .00  |
| <i>Holdemania</i>            | .03 | .05  | .04 | .06  |
| <i>Loktanella</i>            | .09 | .33  | .10 | .47  |
| <i>Tetragenococcus</i>       | .01 | .02  | .01 | .01  |
| <i>Weissella</i>             | .05 | .21  | .23 | 1.03 |
| <i>Brevundimonas</i>         | .12 | .46  | .06 | .28  |
| <i>Candidatus Endobugula</i> | .00 | .01  | .00 | .00  |
| <i>Ectothiorhodospira</i>    | .00 | .00  | .00 | .00  |
| <i>Exiguobacterium</i>       | .01 | .01  | .01 | .01  |
| <i>Leptospira</i>            | .00 | .03  | .00 | .00  |
| <i>Planifilum</i>            | .01 | .03  | .01 | .01  |
| <i>Rickettsia</i>            | .00 | .01  | .00 | .00  |
| <i>Sphingobium</i>           | .13 | .61  | .01 | .02  |
| <i>Sphingomonas</i>          | .05 | .36  | .01 | .01  |

|                         |     |      |      |      |
|-------------------------|-----|------|------|------|
| <i>Trichodesmium</i>    | .03 | .11  | .03  | .06  |
| <i>Cystobacter</i>      | .00 | .02  | .00  | .00  |
| <i>Deferribacter</i>    | .00 | .00  | .00  | .00  |
| <i>Desulfotomaculum</i> | .00 | .00  | .00  | .00  |
| <i>Escherichia</i>      | .13 | .37  | .05  | .09  |
| <i>Gemella</i>          | .02 | .08  | .18* | .80  |
| <i>Legionella</i>       | .00 | .01  | .00  | .00  |
| <i>Pediococcus</i>      | .00 | .00  | .00  | .00  |
| <i>Planomicrobium</i>   | .01 | .02  | .00  | .00  |
| <i>Ralstonia</i>        | .01 | .03  | .00  | .00  |
| <i>Rhodococcus</i>      | .04 | .19  | .00  | .00  |
| <i>Thermobaculum</i>    | .00 | .01  | .00  | .01  |
| <i>Thiomonas</i>        | .00 | .01  | .01  | .02  |
| <i>Anaerofustis</i>     | .00 | .00  | .00  | .00  |
| <i>Anaerovibrio</i>     | .00 | .03  | .00  | .00  |
| <i>Asticcacaulis</i>    | .00 | .01  | .00  | .01  |
| <i>Bacillus</i>         | .02 | .12  | .00  | .00  |
| <i>Bradyrhizobium</i>   | .01 | .03  | .01  | .02  |
| <i>Bulleidia</i>        | .01 | .05  | .02  | .07  |
| <i>Citrobacter</i>      | .23 | 1.95 | .02  | .09  |
| <i>Cohnella</i>         | .02 | .08  | .02  | .02  |
| <i>Coriobacterium</i>   | .00 | .00  | .01  | .03  |
| <i>Devosia</i>          | .01 | .06  | .00  | .00  |
| <i>Granulicatella</i>   | .01 | .03  | .02  | .03  |
| <i>Haemophilus</i>      | .00 | .01  | .01  | .02  |
| <i>Mitsuokella</i>      | .01 | .10  | .02  | .11  |
| <i>Myroides</i>         | .01 | .14  | .00  | .00  |
| <i>Niastella</i>        | .01 | .02  | .00  | .00  |
| <i>Ochrobactrum</i>     | .00 | .02  | .00  | .01  |
| <i>Parascardovia</i>    | .02 | .03  | .02  | .02  |
| <i>Rhodobacter</i>      | .01 | .03  | .00  | .00  |
| <i>Rikenella</i>        | .00 | .00  | .00  | .00  |
| <i>Sarcina</i>          | .11 | .35  | .12  | .27  |
| <i>Sphingopyxis</i>     | .01 | .03  | .00  | .01  |
| <i>Succiniclasticum</i> | .01 | .08  | .00  | .00  |
| <i>Variovorax</i>       | .00 | .01  | .00  | .00  |
| <i>Acidovorax</i>       | .09 | .59  | .00  | .00  |
| <i>Acinetobacter</i>    | .08 | .27  | .04  | .15  |
| <i>Aerococcus</i>       | .08 | .88  | .00  | .00  |
| <i>Agrobacterium</i>    | .05 | .27  | .00  | .00  |
| <i>Akkermansia</i>      | .01 | .05  | .02  | .06  |
| <i>Alicyclophilus</i>   | .01 | .07  | .00  | .00  |
| <i>Anoxybacillus</i>    | .07 | .53  | .00  | .00  |
| <i>Burkholderia</i>     | .04 | .17  | .02  | .05  |
| <i>Caloramator</i>      | .00 | .00  | .00  | .00  |
| <i>Catenibacterium</i>  | .19 | .76  | .25  | 1.19 |
| <i>Chroococcus</i>      | .02 | .06  | .01  | .01  |
| <i>Citricoccus</i>      | .00 | .03  | .00  | .00  |
| <i>Cloacibacillus</i>   | .00 | .04  | .01  | .05  |
| <i>Comamonas</i>        | .32 | 1.87 | .00  | .00  |
| <i>Curvibacter</i>      | .00 | .01  | .00  | .00  |
| <i>Dechloromonas</i>    | .01 | .04  | .00  | .00  |
| <i>Delftia</i>          | .22 | 1.11 | .00  | .00  |
| <i>Denitrobacter</i>    | .05 | .44  | .53  | 2.52 |

|                           |     |      |      |     |
|---------------------------|-----|------|------|-----|
| <i>Erwinia</i>            | .00 | .01  | .01  | .04 |
| <i>Ferrimicrobium</i>     | .00 | .01  | .00  | .00 |
| <i>Fusibacter</i>         | .01 | .04  | .01  | .03 |
| <i>Gallionella</i>        | .00 | .01  | .01  | .02 |
| <i>Giesbergeria</i>       | .01 | .04  | .00  | .00 |
| <i>Gluconacetobacter</i>  | .02 | .16  | .00  | .00 |
| <i>Haloanella</i>         | .04 | .39  | .00  | .00 |
| <i>Herbaspirillum</i>     | .00 | .01  | .00  | .01 |
| <i>Hydrogenophaga</i>     | .02 | .17  | .00  | .00 |
| <i>Klebsiella</i>         | .08 | .68  | .00  | .01 |
| <i>Leptothrix</i>         | .00 | .02  | .00  | .00 |
| <i>Leucobacter</i>        | .00 | .01  | .00  | .01 |
| <i>Leuconostoc</i>        | .03 | .22  | .01  | .03 |
| <i>Luteimonas</i>         | .01 | .03  | .00  | .00 |
| <i>Macrococcus</i>        | .00 | .01  | .00  | .01 |
| <i>Mesorhizobium</i>      | .01 | .03  | .01  | .06 |
| <i>Methylibium</i>        | .02 | .25  | .00  | .00 |
| <i>Mycoplana</i>          | .00 | .03  | .00  | .00 |
| <i>Olivibacter</i>        | .01 | .04  | .00  | .00 |
| <i>Phenyllobacterium</i>  | .05 | .55  | .00  | .00 |
| <i>Plesiomonas</i>        | .01 | .06  | .00  | .00 |
| <i>Proteus</i>            | .01 | .10  | .00  | .00 |
| <i>Providencia</i>        | .00 | .01  | .01  | .01 |
| <i>Pseudochrobactrum</i>  | .01 | .09  | .00  | .00 |
| <i>Pseudoclavibacter</i>  | .00 | .02  | .00  | .00 |
| <i>Pseudoxanthomonas</i>  | .03 | .27  | .00  | .00 |
| <i>Psychrobacter</i>      | .14 | 1.22 | .00  | .00 |
| <i>Rhizobium</i>          | .01 | .02  | .00  | .01 |
| <i>Rhodoferax</i>         | .00 | .03  | .00  | .00 |
| <i>Rhodoplanes</i>        | .01 | .04  | .00  | .00 |
| <i>Rothia</i>             | .00 | .01  | .00  | .01 |
| <i>Sediminibacterium</i>  | .00 | .02  | .00  | .00 |
| <i>Serratia</i>           | .03 | .16  | .01  | .01 |
| <i>Shinella</i>           | .01 | .06  | .00  | .00 |
| <i>Sneathia</i>           | .00 | .02  | .19* | .73 |
| <i>Solibacillus</i>       | .04 | .45  | .00  | .00 |
| <i>Sphingobacterium</i>   | .09 | .44  | .00  | .00 |
| <i>Sporolactobacillus</i> | .00 | .01  | .01  | .00 |
| <i>Stenotrophomonas</i>   | .15 | .77  | .00  | .01 |
| <i>Succinivibrio</i>      | .00 | .04  | .06* | .27 |
| <i>Thauera</i>            | .02 | .17  | .00  | .00 |
| <i>Thermomonas</i>        | .03 | .27  | .00  | .00 |
| <i>Vagococcus</i>         | .01 | .04  | .03  | .15 |
| <i>Vibrio</i>             | .00 | .01  | .00  | .00 |
| <i>Viridibacillus</i>     | .02 | .10  | .01  | .05 |
| <i>Xanthomonas</i>        | .03 | .21  | .00  | .00 |
| <i>Zobellia</i>           | .00 | .00  | .00  | .01 |

**Supplementary Table 2.** Mean abundance values  $\pm$  SD of bacterial genera from fecal samples categorized per MD score of participants. \*  $p < 0.05$ .

|  | MD score |     |
|--|----------|-----|
|  | 0-5      | 6-9 |

|                               | Mean  | Standard deviation | Mean  | Standard deviation |
|-------------------------------|-------|--------------------|-------|--------------------|
| <i>Prevotella</i>             | 4.98  | 8.80               | 4.23  | 7.79               |
| <i>Bacteroides</i>            | 22.39 | 11.62              | 21.33 | 11.41              |
| <i>Sedimentibacter</i>        | .14   | .71                | .20   | 1.07               |
| <i>Porphyromonas</i>          | .17   | .72                | .20   | 1.03               |
| <i>Peptoniphilus</i>          | .38   | 1.20               | .38   | 1.08               |
| <i>Halanaerobium</i>          | .12   | .52                | .14   | .48                |
| <i>Corynebacterium</i>        | .37   | 1.20               | .75   | 2.28               |
| <i>Negativicoccus</i>         | .55   | 1.16               | .58   | 1.31               |
| <i>Faecalibacterium</i>       | 11.94 | 6.43               | 13.57 | 7.34               |
| <i>Anaerococcus</i>           | .27   | 1.64               | .15   | .73                |
| <i>Oscillospira</i>           | 2.18  | 1.90               | 1.73* | 1.26               |
| <i>Blautia</i>                | 8.38  | 5.15               | 7.95  | 4.05               |
| <i>Flavobacterium</i>         | 2.68  | 3.65               | 2.87  | 3.23               |
| <i>Roseburia</i>              | 5.09  | 5.34               | 5.02  | 4.32               |
| <i>Campylobacter</i>          | .08   | .35                | .08   | .54                |
| <i>Lactobacillus</i>          | .29   | .52                | 1.26  | 4.53               |
| <i>Clostridium</i>            | 1.18  | .78                | 1.36  | 1.26               |
| <i>Ruminococcus</i>           | 9.51  | 6.70               | 7.64  | 4.91               |
| <i>Lachnospira</i>            | 0.37  | 0.20               | 0.75* | 0.23               |
| <i>Methylobacterium</i>       | .05   | .16                | .05   | .12                |
| <i>Selenomonas</i>            | .25   | .43                | .26   | .79                |
| <i>Aminiphilus</i>            | .92   | 2.06               | .81   | 1.59               |
| <i>Megasphaera</i>            | .20   | .57                | .13   | .40                |
| <i>Coproccoccus</i>           | 1.36  | 1.48               | 1.16  | 1.45               |
| <i>Fusobacterium</i>          | .03   | .10                | .03   | .12                |
| <i>Parabacteroides</i>        | 2.33  | 3.99               | 1.86  | 1.52               |
| <i>Sutterella</i>             | .84   | .96                | .81   | 1.11               |
| <i>Streptomyces</i>           | .02   | .06                | .02   | .06                |
| <i>Arcanobacterium</i>        | .02   | .08                | .00   | .03                |
| <i>Streptococcus</i>          | 1.99  | 3.64               | 2.09  | 3.11               |
| <i>Actinomyces</i>            | .18   | .71                | .11   | .15                |
| <i>Peptostreptococcus</i>     | .03   | .05                | .05   | .22                |
| <i>Mobiluncus</i>             | .02   | .06                | .02   | .12                |
| <i>Collinsella</i>            | 1.89  | 2.96               | 1.84  | 3.46               |
| <i>Acidaminococcus</i>        | .10   | .29                | .06   | .21                |
| <i>Dorea</i>                  | 1.63  | 3.23               | 1.09  | 2.01               |
| <i>Lachnobacterium</i>        | .45   | 1.60               | .22   | .40                |
| <i>Finegoldia</i>             | .11   | .83                | .03   | .12                |
| <i>Odoribacter</i>            | .24   | .21                | .21   | .21                |
| <i>Borrelia</i>               | .00   | .03                | .00   | .02                |
| <i>Brevibacterium</i>         | .08   | .20                | .10   | .21                |
| <i>Peptococcus</i>            | .12   | .09                | .14   | .14                |
| <i>Slackia</i>                | .71   | .49                | .70   | .58                |
| <i>Facklamia</i>              | .02   | .15                | .02   | .15                |
| <i>Propionispora</i>          | .12   | .09                | .11   | .14                |
| <i>Bilophila</i>              | .06   | .08                | .05   | .08                |
| <i>Atopobium</i>              | .23   | .27                | .23   | .33                |
| <i>Brevibacillus</i>          | .65   | .90                | .74   | 1.34               |
| <i>Butyricimonas</i>          | .22   | .19                | .19   | .17                |
| <i>Jannaschia</i>             | .18   | .31                | .23   | .39                |
| <i>Lactococcus</i>            | .23   | .53                | .52*  | 1.31               |
| <i>Candidatus Phytoplasma</i> | .07   | .05                | .11*  | .17                |

|                              |     |      |      |      |
|------------------------------|-----|------|------|------|
| <i>Dialister</i>             | .55 | 1.46 | .37  | .81  |
| <i>Megamonas</i>             | .48 | 3.17 | .17  | 1.29 |
| <i>Veillonella</i>           | .09 | .05  | .14* | .18  |
| <i>Ureaplasma</i>            | .00 | .01  | .00  | .00  |
| <i>Rhodospirillum</i>        | .14 | .08  | .16  | .14  |
| <i>Mesoplasma</i>            | .01 | .01  | .01  | .02  |
| <i>Pectinatus</i>            | .02 | .02  | .02  | .01  |
| <i>Fibrobacter</i>           | .03 | .06  | .03  | .04  |
| <i>Tenacibaculum</i>         | .02 | .06  | .01  | .02  |
| <i>Bartonella</i>            | .09 | .10  | .10  | .10  |
| <i>Methylocella</i>          | .04 | .04  | .06  | .19  |
| <i>Emticicia</i>             | .05 | .02  | .06  | .09  |
| <i>Bifidobacterium</i>       | .26 | .23  | .29  | .37  |
| <i>Sediminibacillus</i>      | .00 | .02  | .01  | .09  |
| <i>Eggerthella</i>           | .12 | .22  | .13  | .21  |
| <i>Acholeplasma</i>          | .13 | .08  | .13  | .20  |
| <i>Microbacterium</i>        | .08 | .07  | .11  | .29  |
| <i>Anaerostipes</i>          | .21 | .25  | .31  | .84  |
| <i>Desulfovibrio</i>         | .07 | .16  | .05  | .09  |
| <i>Pedobacter</i>            | .05 | .05  | .08  | .21  |
| <i>Eubacterium</i>           | .71 | 2.19 | 1.04 | 2.69 |
| <i>Mycobacterium</i>         | .00 | .01  | .01  | .01  |
| <i>Paraprevotella</i>        | .23 | .38  | .13* | .22  |
| <i>Varibaculum</i>           | .05 | .32  | .02  | .12  |
| <i>Paucibacter</i>           | .01 | .02  | .01  | .04  |
| <i>Mogibacterium</i>         | .04 | .06  | .04  | .07  |
| <i>Anaerotruncus</i>         | .05 | .08  | .03  | .05  |
| <i>Chlorobaculum</i>         | .01 | .01  | .01  | .01  |
| <i>Thermoanaerobacterium</i> | .00 | .01  | .00  | .01  |
| <i>Desulfosporosinus</i>     | .03 | .03  | .04  | .10  |
| <i>Trabulsiella</i>          | .14 | .42  | .13  | .42  |
| <i>Adlercreutzia</i>         | .15 | .62  | .13  | .34  |
| <i>Brachybacterium</i>       | .00 | .01  | .01  | .04  |
| <i>Paenibacillus</i>         | .03 | .10  | .02  | .02  |
| <i>Pseudomonas</i>           | .25 | 1.02 | .84  | 4.45 |
| <i>Salinicoccus</i>          | .38 | 1.30 | .23  | .39  |
| <i>Turcibacter</i>           | .07 | .17  | .38  | 1.64 |
| <i>Enterococcus</i>          | .60 | 1.43 | .64  | 1.46 |
| <i>Lautropia</i>             | .02 | .05  | .02  | .10  |
| <i>Stenoxybacter</i>         | .01 | .01  | .01  | .03  |
| <i>Dysgonomonas</i>          | .01 | .01  | .01  | .05  |
| <i>Geobacillus</i>           | .03 | .04  | .04  | .05  |
| <i>Actinobaculum</i>         | .02 | .17  | .00  | .01  |
| <i>Alkaliphilus</i>          | .04 | .09  | .05  | .15  |
| <i>Caldicellulosiruptor</i>  | .00 | .00  | .01  | .01  |
| <i>Fructobacillus</i>        | .04 | .04  | .05  | .07  |
| <i>Natronincola</i>          | .04 | .10  | .03  | .06  |
| <i>Phascolarctobacterium</i> | .39 | .62  | .53  | .89  |
| <i>Thermodesulfovibrio</i>   | .01 | .01  | .01* | .03  |
| <i>Dethiosulfovibrio</i>     | .00 | .01  | .00  | .01  |
| <i>Flammeovirga</i>          | .00 | .00  | .00  | .00  |
| <i>Novosphingobium</i>       | .00 | .01  | .01  | .03  |
| <i>Oxalobacter</i>           | .01 | .02  | .00  | .01  |
| <i>Staphylococcus</i>        | .05 | .21  | .06  | .22  |

|                              |     |      |     |     |
|------------------------------|-----|------|-----|-----|
| <i>Acetobacterium</i>        | .02 | .13  | .01 | .06 |
| <i>Azospirillum</i>          | .02 | .01  | .02 | .03 |
| <i>Sporosarcina</i>          | .08 | .66  | .01 | .01 |
| <i>Syntrophomonas</i>        | .01 | .01  | .01 | .02 |
| <i>Caldilinea</i>            | .01 | .01  | .01 | .02 |
| <i>Coprobacillus</i>         | .54 | 1.63 | .14 | .45 |
| <i>Jeotgalicoccus</i>        | .00 | .00  | .01 | .04 |
| <i>Kitasatospora</i>         | .01 | .01  | .01 | .03 |
| <i>Rhodanobacter</i>         | .01 | .03  | .00 | .01 |
| <i>Zhouia</i>                | .04 | .06  | .04 | .12 |
| <i>Carboxydocella</i>        | .00 | .00  | .00 | .00 |
| <i>Carnobacterium</i>        | .03 | .23  | .02 | .05 |
| <i>Chryseobacterium</i>      | .32 | 2.67 | .14 | .81 |
| <i>Enterobacter</i>          | .19 | .53  | .19 | .68 |
| <i>Luteococcus</i>           | .00 | .00  | .00 | .01 |
| <i>Marinobacter</i>          | .00 | .00  | .01 | .01 |
| <i>Microvirus</i>            | .01 | .01  | .01 | .01 |
| <i>Paracoccus</i>            | .01 | .01  | .02 | .10 |
| <i>Roseospira</i>            | .01 | .01  | .03 | .16 |
| <i>Sinorhizobium</i>         | .03 | .14  | .02 | .05 |
| <i>Trichococcus</i>          | .03 | .08  | .07 | .44 |
| <i>Amycolatopsis</i>         | .01 | .00  | .01 | .06 |
| <i>Anaerofilum</i>           | .01 | .02  | .01 | .03 |
| <i>Arcobacter</i>            | .04 | .28  | .08 | .43 |
| <i>Brochothrix</i>           | .01 | .01  | .01 | .02 |
| <i>Caulobacter</i>           | .01 | .01  | .01 | .01 |
| <i>Luteibacter</i>           | .01 | .04  | .01 | .01 |
| <i>Pseudoalteromonas</i>     | .01 | .01  | .01 | .02 |
| <i>Thermicanus</i>           | .01 | .01  | .01 | .01 |
| <i>Thiothrix</i>             | .00 | .00  | .00 | .00 |
| <i>Achromobacter</i>         | .04 | .20  | .09 | .56 |
| <i>Arthrobacter</i>          | .11 | .97  | .01 | .07 |
| <i>Desulfonatronovibrio</i>  | .03 | .02  | .03 | .06 |
| <i>Dyadobacter</i>           | .00 | .00  | .01 | .03 |
| <i>Holdemania</i>            | .03 | .06  | .03 | .03 |
| <i>Loktanella</i>            | .11 | .44  | .06 | .23 |
| <i>Tetragenococcus</i>       | .01 | .02  | .01 | .01 |
| <i>Weissella</i>             | .10 | .59  | .05 | .25 |
| <i>Brevundimonas</i>         | .05 | .24  | .17 | .57 |
| <i>Candidatus Endobugula</i> | .00 | .00  | .01 | .01 |
| <i>Ectothiorhodospira</i>    | .00 | .00  | .00 | .00 |
| <i>Exiguobacterium</i>       | .01 | .01  | .01 | .01 |
| <i>Leptospira</i>            | .00 | .00  | .01 | .04 |
| <i>Planifilum</i>            | .01 | .02  | .01 | .03 |
| <i>Rickettsia</i>            | .00 | .00  | .00 | .01 |
| <i>Sphingobium</i>           | .05 | .31  | .17 | .73 |
| <i>Sphingomonas</i>          | .02 | .03  | .07 | .47 |
| <i>Trichodesmium</i>         | .02 | .09  | .04 | .12 |
| <i>Cystobacter</i>           | .00 | .00  | .00 | .02 |
| <i>Deferribacter</i>         | .00 | .00  | .00 | .00 |
| <i>Desulfotomaculum</i>      | .00 | .00  | .00 | .00 |
| <i>Escherichia</i>           | .15 | .44  | .08 | .17 |
| <i>Gemella</i>               | .03 | .10  | .06 | .47 |
| <i>Legionella</i>            | .00 | .00  | .00 | .01 |



|                          |     |      |     |      |
|--------------------------|-----|------|-----|------|
| <i>Pediococcus</i>       | .00 | .00  | .00 | .00  |
| <i>Planomicrobium</i>    | .01 | .03  | .00 | .01  |
| <i>Ralstonia</i>         | .00 | .00  | .01 | .04  |
| <i>Rhodococcus</i>       | .04 | .16  | .02 | .18  |
| <i>Thermobaculum</i>     | .00 | .01  | .01 | .01  |
| <i>Thiomonas</i>         | .00 | .01  | .00 | .01  |
| <i>Anaerofustis</i>      | .00 | .00  | .00 | .00  |
| <i>Anaerovibrio</i>      | .00 | .00  | .01 | .04  |
| <i>Asticcacaulis</i>     | .00 | .01  | .01 | .01  |
| <i>Bacillus</i>          | .03 | .15  | .00 | .01  |
| <i>Bradyrhizobium</i>    | .01 | .02  | .01 | .03  |
| <i>Bulleidia</i>         | .01 | .06  | .01 | .04  |
| <i>Citrobacter</i>       | .01 | .07  | .39 | 2.56 |
| <i>Cohnella</i>          | .02 | .04  | .03 | .10  |
| <i>Coriobacterium</i>    | .00 | .02  | .00 | .00  |
| <i>Devosia</i>           | .00 | .00  | .01 | .07  |
| <i>Granulicatella</i>    | .01 | .02  | .02 | .04  |
| <i>Haemophilus</i>       | .00 | .01  | .00 | .01  |
| <i>Mitsuokella</i>       | .00 | .00  | .03 | .14  |
| <i>Myroides</i>          | .00 | .00  | .02 | .18  |
| <i>Niastella</i>         | .00 | .00  | .01 | .03  |
| <i>Ochrobactrum</i>      | .00 | .02  | .00 | .02  |
| <i>Parascardovia</i>     | .01 | .02  | .02 | .03  |
| <i>Rhodobacter</i>       | .01 | .01  | .02 | .04  |
| <i>Rikenella</i>         | .00 | .00  | .00 | .01  |
| <i>Sarcina</i>           | .07 | .18  | .15 | .45  |
| <i>Sphingopyxis</i>      | .00 | .02  | .01 | .04  |
| <i>Succiniclasticum</i>  | .01 | .09  | .01 | .03  |
| <i>Variovorax</i>        | .00 | .01  | .00 | .01  |
| <i>Acidovorax</i>        | .04 | .18  | .11 | .75  |
| <i>Acinetobacter</i>     | .08 | .24  | .11 | .42  |
| <i>Aerococcus</i>        | .00 | .01  | .14 | 1.15 |
| <i>Agrobacterium</i>     | .01 | .03  | .07 | .35  |
| <i>Akkermansia</i>       | .01 | .03  | .01 | .06  |
| <i>Alicyclophilus</i>    | .00 | .02  | .01 | .09  |
| <i>Anoxybacillus</i>     | .11 | .67  | .00 | .00  |
| <i>Burkholderia</i>      | .05 | .21  | .02 | .05  |
| <i>Caloramator</i>       | .00 | .00  | .00 | .00  |
| <i>Catenibacterium</i>   | .17 | .79  | .23 | .89  |
| <i>Chroococcus</i>       | .02 | .06  | .01 | .05  |
| <i>Citricoccus</i>       | .01 | .04  | .00 | .00  |
| <i>Cloacibacillus</i>    | .01 | .03  | .01 | .04  |
| <i>Comamonas</i>         | .13 | .65  | .41 | 2.36 |
| <i>Curvibacter</i>       | .00 | .01  | .00 | .01  |
| <i>Dechloromonas</i>     | .00 | .00  | .01 | .06  |
| <i>Delftia</i>           | .21 | 1.07 | .15 | .94  |
| <i>Denitrobacter</i>     | .23 | 1.50 | .02 | .16  |
| <i>Erwinia</i>           | .00 | .00  | .01 | .03  |
| <i>Ferrimicrobium</i>    | .00 | .00  | .00 | .01  |
| <i>Fusibacter</i>        | .01 | .01  | .01 | .05  |
| <i>Gallionella</i>       | .01 | .01  | .01 | .01  |
| <i>Giesbergeria</i>      | .01 | .05  | .00 | .01  |
| <i>Gluconacetobacter</i> | .00 | .00  | .03 | .21  |
| <i>Haloanella</i>        | .00 | .00  | .06 | .51  |

|                           |     |     |     |      |
|---------------------------|-----|-----|-----|------|
| <i>Herbaspirillum</i>     | .00 | .01 | .01 | .01  |
| <i>Hydrogenophaga</i>     | .00 | .00 | .03 | .22  |
| <i>Klebsiella</i>         | .12 | .86 | .01 | .03  |
| <i>Leptothrix</i>         | .00 | .00 | .00 | .02  |
| <i>Leucobacter</i>        | .00 | .01 | .00 | .01  |
| <i>Leuconostoc</i>        | .02 | .06 | .05 | .28  |
| <i>Luteimonas</i>         | .00 | .01 | .01 | .03  |
| <i>Macrococcus</i>        | .01 | .02 | .00 | .00  |
| <i>Mesorhizobium</i>      | .01 | .04 | .00 | .03  |
| <i>Methylibium</i>        | .00 | .00 | .04 | .33  |
| <i>Mycoplana</i>          | .00 | .01 | .00 | .04  |
| <i>Olivibacter</i>        | .00 | .03 | .01 | .05  |
| <i>Phenyllobacterium</i>  | .08 | .69 | .00 | .03  |
| <i>Plesiomonas</i>        | .01 | .06 | .01 | .05  |
| <i>Proteus</i>            | .00 | .00 | .02 | .13  |
| <i>Providencia</i>        | .00 | .00 | .00 | .01  |
| <i>Pseudochrobactrum</i>  | .01 | .11 | .00 | .01  |
| <i>Pseudoclavibacter</i>  | .00 | .01 | .00 | .02  |
| <i>Pseudoxanthomonas</i>  | .01 | .04 | .05 | .35  |
| <i>Psychrobacter</i>      | .00 | .00 | .24 | 1.60 |
| <i>Rhizobium</i>          | .01 | .02 | .01 | .03  |
| <i>Rhodoferax</i>         | .00 | .00 | .01 | .04  |
| <i>Rhodoplanes</i>        | .00 | .01 | .01 | .05  |
| <i>Rothia</i>             | .00 | .00 | .00 | .01  |
| <i>Sediminibacterium</i>  | .00 | .00 | .00 | .02  |
| <i>Serratia</i>           | .02 | .03 | .04 | .21  |
| <i>Shinella</i>           | .01 | .04 | .01 | .07  |
| <i>Sneathia</i>           | .06 | .41 | .00 | .03  |
| <i>Solibacillus</i>       | .07 | .56 | .00 | .00  |
| <i>Sphingobacterium</i>   | .03 | .23 | .12 | .53  |
| <i>Sporolactobacillus</i> | .01 | .01 | .00 | .00  |
| <i>Stenotrophomonas</i>   | .11 | .62 | .16 | .78  |
| <i>Succinivibrio</i>      | .02 | .15 | .01 | .06  |
| <i>Thauera</i>            | .00 | .00 | .03 | .22  |
| <i>Thermomonas</i>        | .00 | .00 | .04 | .35  |
| <i>Vagococcus</i>         | .00 | .01 | .02 | .10  |
| <i>Vibrio</i>             | .00 | .01 | .00 | .01  |
| <i>Viridibacillus</i>     | .03 | .13 | .01 | .04  |
| <i>Xanthomonas</i>        | .01 | .05 | .04 | .28  |
| <i>Zobellia</i>           | .00 | .01 | .00 | .00  |

Supplementary Table 3. Mean abundance values  $\pm$  SD of bacterial genera from fecal samples categorized per PA level of participants. \*  $p < 0.05$ .

|                        | PA level |                    |          |                    |       |                    |
|------------------------|----------|--------------------|----------|--------------------|-------|--------------------|
|                        | low      |                    | moderate |                    | high  |                    |
|                        | Mean     | Standard deviation | Mean     | Standard deviation | Mean  | Standard deviation |
| <i>Prevotella</i>      | 3.68     | 5.38               | 4.96     | 9.26               | 4.57  | 8.15               |
| <i>Bacteroides</i>     | 22.86    | 12.42              | 22.17    | 12.37              | 21.38 | 10.58              |
| <i>Sedimentibacter</i> | .04      | .08                | .14      | .79                | .23   | 1.08               |
| <i>Porphyromonas</i>   | .07      | .20                | .21      | .86                | .19   | 1.00               |
| <i>Peptoniphilus</i>   | .15      | .08                | .44      | 1.35               | .38   | 1.09               |
| <i>Halanaerobium</i>   | .03      | .05                | .21      | .70                | .08   | .30                |

|                               |       |      |       |      |       |      |
|-------------------------------|-------|------|-------|------|-------|------|
| <i>Corynebacterium</i>        | .52   | 1.60 | .65   | 1.79 | .47   | 1.88 |
| <i>Negativicoccus</i>         | .43   | .92  | .44   | 1.14 | .71   | 1.37 |
| <i>Faecalibacterium</i>       | 13.44 | 8.62 | 12.53 | 6.38 | 12.70 | 6.96 |
| <i>Anaerococcus</i>           | .03   | .05  | .33   | 1.86 | .16   | .73  |
| <i>Oscillospira</i>           | 2.10  | 1.59 | 2.24  | 2.03 | 1.69  | 1.19 |
| <i>Blautia</i>                | 7.31  | 4.89 | 8.29  | 5.11 | 8.30  | 4.19 |
| <i>Flavobacterium</i>         | 2.36  | 1.95 | 3.19  | 3.95 | 2.52  | 3.27 |
| <i>Roseburia</i>              | 4.44  | 3.44 | 4.38  | 4.02 | 5.81  | 5.72 |
| <i>Campylobacter</i>          | .01   | .01  | .11   | .39  | .09   | .55  |
| <i>Lactobacillus</i>          | .11   | .12  | .79   | 4.27 | .88   | 2.40 |
| <i>Clostridium</i>            | 1.01  | .63  | 1.16  | .75  | 1.42  | 1.29 |
| <i>Ruminococcus</i>           | 8.97  | 6.99 | 8.27  | 5.75 | 8.83  | 5.94 |
| <i>Lachnospira</i>            | 4.82  | 2.60 | 4.16  | 2.38 | 4.11  | 1.91 |
| <i>Methylobacterium</i>       | .02   | .03  | .05   | .18  | .06   | .12  |
| <i>Selenomonas</i>            | .13   | .22  | .20   | .39  | .34   | .83  |
| <i>Aminiphilus</i>            | 1.14  | 1.89 | .77   | 2.05 | .88   | 1.65 |
| <i>Megasphaera</i>            | .55*  | 1.08 | .12   | .24  | .11   | .37  |
| <i>Coprococcus</i>            | .96   | 1.14 | 1.55  | 1.73 | 1.09  | 1.25 |
| <i>Fusobacterium</i>          | .03   | .09  | .04   | .11  | .03   | .12  |
| <i>Parabacteroides</i>        | 3.62  | 7.36 | 2.00  | 2.12 | 1.81  | 1.49 |
| <i>Sutterella</i>             | .71   | .90  | .79   | 1.13 | .88   | .98  |
| <i>Streptomyces</i>           | .01   | .01  | .02   | .07  | .02   | .06  |
| <i>Arcanobacterium</i>        | .01   | .02  | .02   | .09  | .00   | .01  |
| <i>Streptococcus</i>          | 2.44  | 6.05 | 1.99  | 3.24 | 1.98  | 2.53 |
| <i>Actinomyces</i>            | .07   | .08  | .11   | .17  | .20   | .74  |
| <i>Peptostreptococcus</i>     | .03   | .04  | .05   | .24  | .03   | .06  |
| <i>Mobiluncus</i>             | .00   | .01  | .02   | .08  | .02   | .12  |
| <i>Collinsella</i>            | 2.47  | 2.85 | 1.56  | 2.45 | 1.97  | 3.81 |
| <i>Acidaminococcus</i>        | .13   | .22  | .05   | .15  | .10   | .33  |
| <i>Dorea</i>                  | .72   | .57  | .97   | 1.39 | 1.88  | 3.68 |
| <i>Lachnobacterium</i>        | 1.31* | 3.21 | .25   | .41  | .17   | .26  |
| <i>Finegoldia</i>             | .01   | .02  | .14   | .94  | .02   | .10  |
| <i>Odoribacter</i>            | .22   | .19  | .24   | .20  | .22   | .22  |
| <i>Borrelia</i>               | .00   | .00  | .01   | .03  | .00   | .02  |
| <i>Brevibacterium</i>         | .15   | .42  | .08   | .07  | .09   | .21  |
| <i>Peptococcus</i>            | .09   | .07  | .13   | .12  | .13   | .12  |
| <i>Slackia</i>                | .77   | .55  | .75   | .56  | .65   | .51  |
| <i>Facklamia</i>              | .00   | .00  | .05   | .23  | .01   | .03  |
| <i>Propionispora</i>          | .11   | .10  | .12   | .10  | .11   | .14  |
| <i>Bilophila</i>              | .10   | .12  | .05   | .06  | .05   | .08  |
| <i>Atopobium</i>              | .27   | .26  | .20   | .20  | .26   | .38  |
| <i>Brevibacillus</i>          | .61   | .78  | .52   | .68  | .86   | 1.45 |
| <i>Butyricimonas</i>          | .28   | .27  | .21   | .18  | .17   | .14  |
| <i>Jannaschia</i>             | .27   | .50  | .25   | .40  | .15   | .25  |
| <i>Lactococcus</i>            | .09   | .13  | .38   | 1.31 | .42   | .77  |
| <i>Candidatus Phytoplasma</i> | .05   | .04  | .09   | .10  | .10   | .16  |
| <i>Dialister</i>              | 1.54* | 2.70 | .40   | .80  | .24   | .58  |
| <i>Megamonas</i>              | .25   | .85  | .49   | 3.55 | .21   | 1.33 |
| <i>Veillonella</i>            | .09   | .04  | .10   | .07  | .13   | .17  |
| <i>Ureaplasma</i>             | .00   | .00  | .00   | .01  | .00   | .01  |
| <i>Rhodospirillum</i>         | .16   | .10  | .16   | .08  | .14   | .14  |
| <i>Mesoplasma</i>             | .00   | .01  | .01   | .01  | .01   | .02  |
| <i>Pectinatus</i>             | .01   | .01  | .02   | .01  | .02   | .02  |
| <i>Fibrobacter</i>            | .03   | .04  | .02   | .03  | .04   | .07  |

|                              |      |      |      |      |      |      |
|------------------------------|------|------|------|------|------|------|
| <i>Tenacibaculum</i>         | .00  | .02  | .02  | .06  | .01  | .03  |
| <i>Bartonella</i>            | .08  | .08  | .08  | .10  | .11  | .11  |
| <i>Methylocella</i>          | .05  | .04  | .04  | .04  | .06  | .19  |
| <i>Emticicia</i>             | .04  | .01  | .05  | .02  | .05  | .09  |
| <i>Bifidobacterium</i>       | .27  | .29  | .27  | .30  | .28  | .31  |
| <i>Sediminibacillus</i>      | .00  | .00  | .01  | .04  | .01  | .09  |
| <i>Eggerthella</i>           | .10  | .12  | .09  | .11  | .16  | .28  |
| <i>Acholeplasma</i>          | .12  | .06  | .15  | .09  | .12  | .19  |
| <i>Microbacterium</i>        | .06  | .04  | .10  | .11  | .10  | .28  |
| <i>Anaerostipes</i>          | .23  | .20  | .18  | .21  | .33  | .86  |
| <i>Desulfovibrio</i>         | .02  | .03  | .09  | .18  | .04  | .08  |
| <i>Pedobacter</i>            | .06  | .05  | .10  | .23  | .04  | .05  |
| <i>Eubacterium</i>           | .54  | 1.36 | 1.18 | 2.88 | .69  | 2.23 |
| <i>Mycobacterium</i>         | .00  | .01  | .01  | .01  | .00  | .01  |
| <i>Paraprevotella</i>        | .33* | .49  | .21  | .30  | .12  | .26  |
| <i>Varibaculum</i>           | .00  | .01  | .05  | .35  | .03  | .14  |
| <i>Paucibacter</i>           | .01  | .01  | .01  | .04  | .01  | .01  |
| <i>Mogibacterium</i>         | .03  | .05  | .05  | .07  | .04  | .07  |
| <i>Anaerotruncus</i>         | .06  | .11  | .04  | .07  | .04  | .05  |
| <i>Chlorobaculum</i>         | .00  | .01  | .01  | .01  | .01  | .01  |
| <i>Thermoanaerobacterium</i> | .00  | .00  | .00  | .01  | .00  | .01  |
| <i>Desulfosporosinus</i>     | .03  | .02  | .04  | .05  | .03  | .09  |
| <i>Trabulsiella</i>          | .29  | .53  | .11  | .47  | .12  | .33  |
| <i>Adlercreutzia</i>         | .38  | 1.27 | .06  | .08  | .14  | .35  |
| <i>Brachybacterium</i>       | .00  | .00  | .00  | .01  | .01  | .04  |
| <i>Paenibacillus</i>         | .02  | .02  | .04  | .11  | .02  | .02  |
| <i>Pseudomonas</i>           | .03  | .10  | .29  | 1.16 | .86  | 4.48 |
| <i>Salinicoccus</i>          | .63  | 2.36 | .22  | .44  | .30  | .68  |
| <i>Turicibacter</i>          | .06  | .12  | .10  | .21  | .37  | 1.65 |
| <i>Enterococcus</i>          | .34  | .47  | .84  | 1.79 | .50  | 1.25 |
| <i>Lautropia</i>             | .01  | .02  | .02  | .05  | .02  | .10  |
| <i>Stenoxybacter</i>         | .01  | .00  | .01  | .01  | .01  | .03  |
| <i>Dysgonomonas</i>          | .01  | .01  | .02  | .06  | .01  | .01  |
| <i>Geobacillus</i>           | .03  | .03  | .02  | .02  | .05* | .06  |
| <i>Actinobaculum</i>         | .00  | .00  | .00  | .02  | .03  | .18  |
| <i>Alkaliphilus</i>          | .07  | .17  | .02  | .02  | .05  | .15  |
| <i>Caldicellulosiruptor</i>  | .00  | .00  | .00  | .00  | .01  | .01  |
| <i>Fructobacillus</i>        | .04  | .03  | .04  | .03  | .05  | .08  |
| <i>Natronincola</i>          | .02  | .01  | .04  | .11  | .03  | .06  |
| <i>Phascolarctobacterium</i> | .24  | .42  | .44  | .83  | .53  | .76  |
| <i>Thermodesulfovibrio</i>   | .00  | .00  | .01  | .02  | .01  | .02  |
| <i>Dethiosulfovibrio</i>     | .00  | .00  | .00  | .02  | .00  | .00  |
| <i>Flammeovirga</i>          | .00  | .01  | .00  | .00  | .00  | .00  |
| <i>Novosphingobium</i>       | .00  | .00  | .00  | .01  | .01  | .03  |
| <i>Oxalobacter</i>           | .01  | .01  | .01  | .02  | .01  | .02  |
| <i>Staphylococcus</i>        | .11  | .41  | .06  | .24  | .03  | .10  |
| <i>Acetobacterium</i>        | .00  | .00  | .03  | .16  | .01  | .03  |
| <i>Azospirillum</i>          | .02  | .01  | .02  | .01  | .02  | .03  |
| <i>Sporosarcina</i>          | .00  | .01  | .10  | .74  | .01  | .01  |
| <i>Syntrophomonas</i>        | .01  | .01  | .01  | .03  | .01  | .01  |
| <i>Caldilinea</i>            | .01  | .01  | .02* | .02  | .01  | .01  |
| <i>Coprobacillus</i>         | .12  | .30  | .30  | 1.15 | .44  | 1.44 |
| <i>Jeotgalicoccus</i>        | .00  | .00  | .01  | .05  | .00  | .00  |
| <i>Kitasatospora</i>         | .01  | .01  | .01  | .01  | .01  | .03  |

|                              |     |     |      |      |     |     |
|------------------------------|-----|-----|------|------|-----|-----|
| <i>Rhodanobacter</i>         | .01 | .05 | .00  | .01  | .01 | .01 |
| <i>Zhouia</i>                | .06 | .07 | .04  | .06  | .04 | .12 |
| <i>Carboxydocella</i>        | .00 | .00 | .00  | .00  | .00 | .00 |
| <i>Carnobacterium</i>        | .00 | .00 | .05  | .26  | .01 | .05 |
| <i>Chryseobacterium</i>      | .00 | .00 | .56  | 3.13 | .01 | .02 |
| <i>Enterobacter</i>          | .25 | .49 | .13  | .45  | .23 | .73 |
| <i>Luteococcus</i>           | .00 | .00 | .00  | .00  | .00 | .01 |
| <i>Marinobacter</i>          | .00 | .00 | .00  | .01  | .01 | .01 |
| <i>Microvirus</i>            | .02 | .01 | .02* | .01  | .01 | .01 |
| <i>Paracoccus</i>            | .01 | .01 | .02  | .11  | .01 | .03 |
| <i>Roseospira</i>            | .01 | .00 | .02  | .02  | .03 | .16 |
| <i>Sinorhizobium</i>         | .01 | .02 | .03  | .16  | .02 | .05 |
| <i>Trichococcus</i>          | .03 | .08 | .02  | .02  | .08 | .45 |
| <i>Amycolatopsis</i>         | .01 | .01 | .01  | .00  | .01 | .06 |
| <i>Anaerofilum</i>           | .01 | .02 | .01  | .02  | .01 | .03 |
| <i>Arcobacter</i>            | .00 | .00 | .09  | .47  | .04 | .29 |
| <i>Brochothrix</i>           | .01 | .00 | .01  | .02  | .01 | .01 |
| <i>Caulobacter</i>           | .00 | .00 | .00  | .01  | .01 | .02 |
| <i>Luteibacter</i>           | .02 | .07 | .00  | .01  | .01 | .01 |
| <i>Pseudoalteromonas</i>     | .01 | .01 | .01  | .02  | .01 | .01 |
| <i>Thermicanus</i>           | .00 | .00 | .01  | .01  | .01 | .01 |
| <i>Thiothrix</i>             | .00 | .00 | .00  | .00  | .00 | .00 |
| <i>Achromobacter</i>         | .03 | .08 | .05  | .23  | .08 | .56 |
| <i>Arthrobacter</i>          | .00 | .00 | .16  | 1.10 | .00 | .02 |
| <i>Desulfonatovibrio</i>     | .02 | .02 | .03  | .02  | .03 | .07 |
| <i>Dyadobacter</i>           | .00 | .00 | .01  | .03  | .00 | .00 |
| <i>Holdemania</i>            | .04 | .04 | .03  | .07  | .03 | .03 |
| <i>Loktanella</i>            | .04 | .16 | .06  | .28  | .13 | .44 |
| <i>Tetragenococcus</i>       | .01 | .00 | .01  | .01  | .01 | .02 |
| <i>Weissella</i>             | .04 | .16 | .02  | .09  | .14 | .65 |
| <i>Brevundimonas</i>         | .11 | .43 | .05  | .16  | .16 | .57 |
| <i>Candidatus Endobugula</i> | .00 | .00 | .00  | .01  | .00 | .00 |
| <i>Ectothiorhodospira</i>    | .00 | .00 | .00  | .00  | .00 | .00 |
| <i>Exiguobacterium</i>       | .01 | .01 | .01  | .01  | .01 | .01 |
| <i>Leptospira</i>            | .00 | .00 | .01  | .03  | .00 | .02 |
| <i>Planifilum</i>            | .01 | .01 | .01  | .01  | .01 | .03 |
| <i>Rickettsia</i>            | .00 | .01 | .00  | .01  | .00 | .00 |
| <i>Sphingobium</i>           | .01 | .01 | .17  | .80  | .08 | .33 |
| <i>Sphingomonas</i>          | .02 | .02 | .02  | .05  | .07 | .47 |
| <i>Trichodesmium</i>         | .02 | .08 | .01  | .05  | .04 | .14 |
| <i>Cystobacter</i>           | .00 | .00 | .00  | .02  | .00 | .00 |
| <i>Deferribacter</i>         | .00 | .00 | .00  | .00  | .00 | .00 |
| <i>Desulfotomaculum</i>      | .00 | .00 | .00  | .00  | .00 | .00 |
| <i>Escherichia</i>           | .20 | .39 | .07  | .17  | .13 | .42 |
| <i>Gemella</i>               | .01 | .01 | .02  | .10  | .07 | .47 |
| <i>Legionella</i>            | .00 | .00 | .00  | .01  | .00 | .00 |
| <i>Pediococcus</i>           | .00 | .00 | .00  | .00  | .00 | .00 |
| <i>Planomicrobium</i>        | .00 | .00 | .01  | .03  | .00 | .00 |
| <i>Ralstonia</i>             | .00 | .00 | .01  | .03  | .01 | .03 |
| <i>Rhodococcus</i>           | .01 | .04 | .06  | .25  | .01 | .08 |
| <i>Thermobaculum</i>         | .00 | .01 | .00  | .00  | .01 | .01 |
| <i>Thiomonas</i>             | .01 | .02 | .00  | .00  | .00 | .01 |
| <i>Anaerofustis</i>          | .00 | .00 | .00  | .00  | .00 | .00 |
| <i>Anaerovibrio</i>          | .00 | .00 | .00  | .00  | .01 | .04 |

|                          |      |      |     |      |     |      |
|--------------------------|------|------|-----|------|-----|------|
| <i>Asticcacaulis</i>     | .00  | .01  | .00 | .01  | .00 | .01  |
| <i>Bacillus</i>          | .01  | .01  | .03 | .16  | .00 | .01  |
| <i>Bradyrhizobium</i>    | .01  | .02  | .01 | .02  | .01 | .03  |
| <i>Bulleidia</i>         | .01  | .01  | .01 | .02  | .02 | .08  |
| <i>Citrobacter</i>       | .02  | .06  | .02 | .09  | .38 | 2.58 |
| <i>Cohnella</i>          | .03  | .08  | .02 | .02  | .03 | .10  |
| <i>Coriobacterium</i>    | .00  | .00  | .00 | .02  | .00 | .00  |
| <i>Devosia</i>           | .00  | .00  | .01 | .08  | .00 | .00  |
| <i>Granulicatella</i>    | .01  | .02  | .01 | .03  | .02 | .03  |
| <i>Haemophilus</i>       | .00  | .00  | .01 | .02  | .00 | .01  |
| <i>Mitsuokella</i>       | .00  | .00  | .01 | .07  | .02 | .13  |
| <i>Myroides</i>          | .00  | .00  | .03 | .19  | .00 | .00  |
| <i>Niastella</i>         | .00  | .00  | .01 | .00  | .01 | .03  |
| <i>Ochrobactrum</i>      | .00  | .00  | .00 | .01  | .01 | .03  |
| <i>Parascardovia</i>     | .02  | .02  | .02 | .02  | .02 | .03  |
| <i>Rhodobacter</i>       | .01  | .01  | .01 | .02  | .01 | .04  |
| <i>Rikenella</i>         | .00  | .01  | .00 | .00  | .00 | .00  |
| <i>Sarcina</i>           | .05  | .08  | .10 | .23  | .13 | .44  |
| <i>Sphingopyxis</i>      | .00  | .00  | .01 | .04  | .01 | .03  |
| <i>Succiniclacticum</i>  | .00  | .00  | .00 | .00  | .02 | .10  |
| <i>Variovorax</i>        | .01  | .02  | .00 | .01  | .00 | .01  |
| <i>Acidovorax</i>        | .09  | .35  | .14 | .82  | .01 | .03  |
| <i>Acinetobacter</i>     | .06  | .17  | .08 | .27  | .12 | .42  |
| <i>Aerococcus</i>        | .00  | .00  | .17 | 1.25 | .00 | .01  |
| <i>Agrobacterium</i>     | .00  | .00  | .01 | .04  | .07 | .36  |
| <i>Akkermansia</i>       | .01  | .02  | .00 | .02  | .01 | .07  |
| <i>Alicyclophilus</i>    | .00  | .00  | .01 | .10  | .00 | .02  |
| <i>Anoxybacillus</i>     | .32* | 1.30 | .04 | .27  | .00 | .00  |
| <i>Burkholderia</i>      | .05  | .11  | .05 | .24  | .02 | .05  |
| <i>Caloramator</i>       | .00  | .00  | .00 | .00  | .00 | .00  |
| <i>Catenibacterium</i>   | .25  | .80  | .29 | 1.09 | .11 | .55  |
| <i>Chroococcus</i>       | .01  | .02  | .03 | .08  | .01 | .01  |
| <i>Citricoccus</i>       | .00  | .00  | .01 | .05  | .00 | .00  |
| <i>Cloacibacillus</i>    | .01  | .06  | .01 | .05  | .00 | .00  |
| <i>Comamonas</i>         | .03  | .13  | .17 | .73  | .40 | 2.38 |
| <i>Curvibacter</i>       | .00  | .00  | .00 | .01  | .00 | .01  |
| <i>Dechloromonas</i>     | .00  | .00  | .01 | .06  | .00 | .00  |
| <i>Delftia</i>           | .04  | .11  | .23 | 1.19 | .18 | .97  |
| <i>Denitrobacter</i>     | .72  | 2.93 | .02 | .18  | .07 | .56  |
| <i>Erwinia</i>           | .00  | .01  | .00 | .00  | .01 | .03  |
| <i>Ferrimicrobium</i>    | .00  | .00  | .00 | .01  | .00 | .01  |
| <i>Fusibacter</i>        | .00  | .00  | .01 | .02  | .01 | .05  |
| <i>Gallionella</i>       | .01  | .02  | .01 | .02  | .00 | .01  |
| <i>Giesbergeria</i>      | .00  | .00  | .00 | .01  | .01 | .05  |
| <i>Gluconacetobacter</i> | .00  | .00  | .00 | .01  | .03 | .21  |
| <i>Haloanella</i>        | .00  | .00  | .07 | .55  | .00 | .00  |
| <i>Herbaspirillum</i>    | .00  | .01  | .00 | .01  | .01 | .01  |
| <i>Hydrogenophaga</i>    | .00  | .00  | .03 | .24  | .00 | .01  |
| <i>Klebsiella</i>        | .46* | 1.77 | .01 | .05  | .01 | .03  |
| <i>Leptothrix</i>        | .00  | .00  | .00 | .03  | .00 | .00  |
| <i>Leucobacter</i>       | .01  | .02  | .00 | .01  | .00 | .01  |
| <i>Leuconostoc</i>       | .02  | .05  | .01 | .02  | .05 | .29  |
| <i>Luteimonas</i>        | .00  | .00  | .01 | .04  | .00 | .01  |
| <i>Macrococcus</i>       | .00  | .00  | .00 | .01  | .00 | .02  |

|                           |     |     |      |      |     |     |
|---------------------------|-----|-----|------|------|-----|-----|
| <i>Mesorhizobium</i>      | .02 | .07 | .01  | .04  | .00 | .01 |
| <i>Methylibium</i>        | .00 | .00 | .05  | .35  | .00 | .00 |
| <i>Mycoplana</i>          | .00 | .00 | .01  | .04  | .00 | .00 |
| <i>Olivibacter</i>        | .00 | .00 | .00  | .02  | .01 | .05 |
| <i>Phenylobacterium</i>   | .00 | .00 | .11  | .78  | .00 | .00 |
| <i>Plesiomonas</i>        | .03 | .12 | .00  | .00  | .01 | .05 |
| <i>Proteus</i>            | .00 | .00 | .02  | .14  | .00 | .01 |
| <i>Providencia</i>        | .00 | .01 | .00  | .01  | .00 | .01 |
| <i>Pseudochrobactrum</i>  | .00 | .00 | .00  | .00  | .02 | .12 |
| <i>Pseudoclavibacter</i>  | .00 | .01 | .00  | .01  | .00 | .02 |
| <i>Pseudoxanthomonas</i>  | .02 | .09 | .05  | .38  | .00 | .03 |
| <i>Psychrobacter</i>      | .00 | .00 | .22  | 1.68 | .05 | .40 |
| <i>Rhizobium</i>          | .00 | .01 | .01  | .03  | .01 | .02 |
| <i>Rhodoferax</i>         | .00 | .00 | .01  | .04  | .00 | .00 |
| <i>Rhodoplanes</i>        | .00 | .01 | .00  | .00  | .01 | .05 |
| <i>Rothia</i>             | .00 | .00 | .00  | .01  | .00 | .01 |
| <i>Sediminibacterium</i>  | .00 | .00 | .00  | .02  | .00 | .00 |
| <i>Serratia</i>           | .02 | .04 | .02  | .05  | .04 | .21 |
| <i>Shinella</i>           | .00 | .00 | .01  | .05  | .01 | .07 |
| <i>Sneathia</i>           | .00 | .00 | .00  | .03  | .07 | .44 |
| <i>Solibacillus</i>       | .00 | .00 | .09  | .63  | .00 | .00 |
| <i>Sphingobacterium</i>   | .00 | .01 | .04  | .15  | .12 | .57 |
| <i>Sporolactobacillus</i> | .00 | .00 | .01* | .01  | .00 | .00 |
| <i>Stenotrophomonas</i>   | .03 | .08 | .18  | .85  | .11 | .65 |
| <i>Succinivibrio</i>      | .08 | .32 | .00  | .00  | .01 | .06 |
| <i>Thauera</i>            | .00 | .00 | .03  | .24  | .00 | .00 |
| <i>Thermomonas</i>        | .00 | .00 | .05  | .38  | .00 | .00 |
| <i>Vagococcus</i>         | .00 | .02 | .00  | .01  | .02 | .10 |
| <i>Vibrio</i>             | .00 | .01 | .00  | .01  | .00 | .01 |
| <i>Viridibacillus</i>     | .03 | .14 | .03  | .13  | .01 | .03 |
| <i>Xanthomonas</i>        | .02 | .09 | .04  | .30  | .01 | .03 |
| <i>Zobellia</i>           | .00 | .01 | .00  | .01  | .00 | .00 |
